# Supplementary material for: The association of GPR85 with PSD-95-neuroligin complex and autism spectrum disorder: a molecular analysis
Source: Springer Nature journal article supplement (doi:10.1186/s13229-015-0012-5), 2015-03-12
Supplement: MOESM1 [file 9785354]

**Table S1. Primers sequences of *GPR85***

| <b>Primer sequence</b>                                 | <b>Products</b> | <b>Annealing temperature</b> |
|--------------------------------------------------------|-----------------|------------------------------|
| 1F TGAGGCTGTATCCTTATCCTC<br>1R GTATAGAAGCGGTGATGGGC    | 419 bp          | 55°C                         |
| 2F TCCACACTGCTTTCATGCTC<br>2R GGTGTTTGCATTTTGCCTG      | 479 bp          | 56°C                         |
| 3F TGGCTAGCAGGATTTGGAAG<br>3R CAATTGCTCAGCAGAGAAGG     | 444 bp          | 54°C                         |
| 4F TCTGTATGCTGATTGGCCTG<br>4R CTGACCAATGATGGGTGATG     | 487 bp          | 55°C                         |
| 5F CATT CAGACAATGCATCTTCAG<br>5R GACTTTTAATTTCCCCACCGG | 284 bp          | 54°C                         |
